# Supplementary material for: Feasibility of a reconfigured domestic violence and abuse training and support intervention responding to affected women, men, children and young people through primary care
Source: PubMed Central journal article supplement (PMC10811857; doi:10.1186/s12875-023-02249-5), 2024-01-26
Supplement: 12875_2023_2249_MOESM5_ESM.pdf [file 12875_2023_2249_MOESM5_ESM.pdf]

Study to test the feasibility of a training and support intervention for general practice to improve the response to women, men and children exposed to domestic violence and abuse (DVA) – Stage 2

## **Interview Schedule for IRIS+ adult support workers\***

### ***Introductory statement***

Thank you for agreeing to do this interview. Introduce self. Today I would like to ask you some questions about your role as an IRIS+ support worker and how your service was received by children and adults. The interview will last between 20-60 minutes. If there are any questions that you don't feel comfortable answering, just tell me and I'll move on to another topic. Or, if you decide you want to stop the interview altogether that's fine, just let me know. Our conversation today is completely confidential.

I am interested in hearing about your views and experiences of the IRIS+ intervention in relation to your role. Although I have a list of questions, please do mention anything that you think is important that I don't ask you. If anything is unclear during the interview, let me know.

### **Consent checklist**

Check participant:

- Has read the participant information sheet
- Understands that their participation is voluntary and that they can change their mind and withdraw at any time without having to give a reason and this won't impact on the support that they are receiving from the IRIS+ service.
- Understands that if I have serious concerns about their safety, or that of any children they mention, that I may need to share this concern with an appropriate agency.
- Understands that personal information about them (such as my name and address) will be treated with strict confidence and securely stored separately from all other data about them (e.g. interview transcripts) at the University of Bristol.
- Agrees that the anonymised information collected about them (anonymised transcripts) may be used to support the current research and relevant future research, and may be shared anonymously.

### **Any questions?**

### **Consent for recording**

With your permission, I'd like to digitally record the interview. This is so the interview can be transcribed. It will be erased after being transcribed. All names of people or places which might identify you or others will not be transcribed. Are you happy to continue with the interview and for it to be digitally recorded?

The recording of the interview will be kept securely and only the anonymised transcript of that interview will be used within the research. The recordings themselves will be erased after transcription.

Can I just confirm that I have your consent to be audio-recorded while this interview takes place?

I'll turn the recorder on now then, and for the record state:

**Today's date is..... my name is..... and your name is ..... and I have your consent to record this interview? (yes)**

### **Opening**

Reflecting on your experience over the past 18 months, and as we near the end of the IRIS+ intervention, can you tell me about your experience and the thoughts and views that you have about it (the IRIS+ intervention)?

→ **Prompts to be used if needed:**

- Implementation
- Uptake by ... [name of agency]
- Uptake by general practices

### **Referral and first contact**

**Over the course of the IRIS+ intervention have the numbers and types of referrals been what you expected?** Did anything about them surprise you? Have they changed over time?

**Thinking about the referral process from the GP's/HCPs to your service...**

What worked well and what would you like to improve?

→ **Prompts to be used if needed:**

- Referrals process, forms and appropriateness?
- Information from GPs/HCPs adequate?
- Men/children referrals – barriers/facilitators?
- How do you feel the referral of children has gone?
- How would you improve this aspect of the intervention – referral and support of men and children?

Has the referral process to IRIS+ changed during the COVID-19 lockdown and ongoing pandemic restrictions. If yes, how?

→ **Prompts to be used if needed:**

- Patient contact
- Timing of changes
- Impact on themselves
- Impact on patients
- Main barriers to practice as usual
- Any facilitators/positives from this?

What other support would help GPs to engage with patients about DVA during the pandemic?

**Were there variations between different practices (IRIS trained v naïve; size/location of practice) or professions of staff (GPs, other HCPs) and perceived reasons for this?**

### **Initial contact**

**Thinking back to when you made contact with men/women who had been referred to your service:**

→ **Prompts to be used if needed:**

- How did the initial contact go? (e.g., was the man/women expecting contact to be made, had they remembered that the referral had been made)
- Did referred men/women express any concern or annoyance at being referred to your service?
- If men/women were not willing to meet with you or did not want further support, what reasons did they give (if any)?
- Were there any particular groups of men/women who were not willing to engage further with your service? Why do you think that is?

### **Working with the general practice**

Can you tell me about how you have engaged and worked with the general practices and the individuals within them?

→ **Prompts to be used if needed:**

- Clinicians
- Safeguarding lead
- Communications – frequency and means (telephone, email, in-person)
- Visiting the practice – experiences of this

In general, how have you found interactions with GPs during the pandemic?

### **Support work**

I want now to turn to the kind of support that your service offers to men/women and children, what that support looks like, how it was received by IRIS+ clients and how you think it could be improved.

**In your role as an Advocate Educator for the IRIS+ study, what support have you offered and provided for (*ask as appropriate*) (You might like to consider specific and varied cases (e.g. those that benefited/didn't benefit, needs fulfilled/not fulfilled):**

- Men who are victims of DVA
- Men who are perpetrators of DVA
- Children exposed to DVA
- Did you feel prepared to work with men? If no, what would you need to become prepared?

- Did you feel supported by your organisation to work with men?
- How does this compare to that offered to women?
- How do you think men should be best supported if they are victims of DVA or perpetrators, within your organisation?

**How do you think men responded to the support offered by your service?**

**What impact (both positive and negative) do you think your support has had on the lives of men and women you have worked with?**

**Have IRIS+ clients asked for support with things you could not help them with?**

- If yes, can you give me some examples? How did you deal with this(e.g. referral to other services etc)

**What are your thoughts about having male and female victims and perpetrators supported by your service? (ask if appropriate)**

### **Impact of COVID-19 on practice and IRIS+ intervention**

**How has your professional practice adapted/changed in response to Covid-19 and the social distancing measures?**

→ **Prompts to be used if needed:**

- Remote consultations – effectiveness, sensitive issues such as DVA
- Changes to presenting problems of patients, incidence of DVA
- Changes to the types of support you can offer
- Has this varied as time has gone or as lockdown measures have varied?
- Challenges/facilitators to offering support to this client group
- Support given/needed to adapt to changes required
- Reorganisation of working practices
- Social distancing
- Changing relationships with colleagues
- Changing relationships with service users
- Reorganisation of work systems
- Staff sickness
- Boundaries between home and work

### **Looking forward**

**How do you think your DVA support service needs to develop to better meet the needs of adults (men and women) and children being referred by primary healthcare professionals?**

**Having worked remotely during the pandemic, what are your thoughts and feelings about the feasibility of continuing remote working in the future?**

→ **Prompts to be used if needed:**

- Possible losses/gains
- Types of work where it works / doesn't work?
- Is it being proposed within the organisation?

**Would you support the roll out of IRIS+ in the future and how do you think your support service needs to develop to facilitate such a rollout?**

### **Conclusions**

**Let the participant know that it's the end of your questions and ask them if there are any other comments that they would like to make.**

**Thank participant for their time.**

\*Please note this is a suggested guide for interviews only. In keeping with standard practice in qualitative research, these questions may be modified & added to as the trial progresses and new themes or areas of interest emerge. We will also adapt this guide for use with participants at earlier or later stages of the study.
